1 Global historic pandemics caused by the FAM-1 genotype of the Irish potato pathogen

2 *Phytophthora infestans*

3 Amanda C. Saville<sup>1</sup>, Jean B. Ristaino\*<sup>1,2</sup>

4 <sup>1</sup> Department of Entomology and Plant Pathology, <sup>2</sup>Emerging Plant Disease and Global Food  
5 Security Cluster 112 Derieux Place, Box 7613, North Carolina State University, Raleigh, NC  
6 USA

## 8 **Abstract**

9 The FAM-1 genotype of *Phytophthora infestans* caused late blight in the 1840s in the US and  
10 Europe and was responsible for the Irish famine. We examined 140 herbarium specimens  
11 collected between 1845 and 1991 from six continents and used 12-plex microsatellite genotyping  
12 (SSR) to identify FAM-1 and the mtDNA lineage (Herb-1/ Ia) present in historic samples. FAM-  
13 1 was detected in approximately 73% of the historic specimens and was found on 6 continents.  
14 The US-1 genotype was found in only 27% of the samples and was found later on all continents  
15 except Australia/Oceania. FAM-1 was the first genotype detected in almost all the former British  
16 colonies from which samples were available. The data from historic samples suggest the FAM-1  
17 genotype was widespread, diverse, and spread more widely than US-1. The famine lineage  
18 spread to six continents over 140 years, and likely spread during global colonization from  
19 Europe.

## 20 **Introduction**

21 Emerging plant diseases threaten crop production and forest ecosystems worldwide<sup>1,2</sup>.  
22 Movement of pathogens due to increased trade of plants and plant products has exacerbated  
23 outbreaks of plant diseases. *Phytophthora infestans* (Mont.) de Bary caused the Irish potato  
24 famine of the 1840s<sup>2</sup>, limits potato and tomato production today, and threatens global food

25 security worldwide<sup>1</sup>. While *P. infestans* can be spread aurally through asexual sporangia, long  
26 distance movement of the pathogen is mainly due to transport of infected tubers for use as seed  
27 potatoes<sup>2</sup>.

28         The history of *P. infestans* consists of a series of migrations, combined with periodic  
29 displacements of one clonal lineage with another, both of which have occurred at local and  
30 global scales<sup>2-5</sup>. The disease first appeared in the US in 1843, near the ports of New York,  
31 Philadelphia and in surrounding states (Supplementary Table 1)<sup>4,5</sup>. The disease was first reported  
32 on the European continent in Belgium in 1845, after which it spread throughout Europe and then  
33 into Ireland<sup>2,5,6</sup>. Historic populations of the pathogen in the US and Europe have been studied  
34 using mycological herbarium specimens to better understand the pathogen's origin, identify the  
35 outbreak strain, and track its spread from the Americas to Europe<sup>6-13</sup>. Herbarium specimens  
36 collected in the 1840s and later from original outbreak specimens revealed that the famine  
37 lineage was a Ia mitochondrial haplotype, disputing previous theories that the US-1 (Ib  
38 haplotype) lineage caused the famine<sup>2,6,8,12,13</sup>. The clonal lineage that caused the Irish potato  
39 famine (FAM-1) was identified, the genome was sequenced, and it's shared ancestry with *P.*  
40 *andina*, a sister species from South America, was documented<sup>6,11</sup>.

41         Microsatellite genotyping (SSRs) has also been used widely to study the population  
42 biology of *P. infestans*<sup>2,10,14</sup>. *P. infestans*-infected leaves from historic specimens collected in  
43 North America and Europe were genotyped using SSRs and migration from North America into  
44 Europe was documented<sup>10</sup>. The FAM-1 genotype caused the first outbreaks in the US and  
45 Europe and was eventually displaced by the newly emerging US-1 genotype around the 1930s-  
46 1950s<sup>9,10</sup>. US-1 continued to persist globally until the 1980s, when it was replaced by more

47 aggressive lineages out of Mexico and Europe, but can still be found in select populations  
48 today<sup>3,15</sup>.

49 Historic migrations of the pathogen into the US and Europe have been studied, but little  
50 is known about migrations of the FAM-1 genotype to other continents after the original 19<sup>th</sup>  
51 century outbreaks<sup>6,10,12,13</sup>. It has been suggested that FAM-1 was less fit and went extinct<sup>8,16</sup>. The  
52 earliest known records of *P. infestans* in Asia indicate it was present in India between 1870 and  
53 1880<sup>17</sup>, in Australia, in Tasmania in 1907<sup>4,18</sup>, and in Kenya in 1941<sup>19</sup>. Genotyping of samples of  
54 *P. infestans* from eastern Africa from the mid-21<sup>st</sup> century revealed the presence of the US-1  
55 genotype<sup>20,21</sup>. Recent genotyping of *P. infestans* from herbarium samples from South and Central  
56 America identified the FAM-1 genotype in Colombia, Guatemala, and Costa Rica between the  
57 1910s and 1940s, suggesting that the FAM-1 genotype was present in these regions for many  
58 years<sup>2,10</sup>.

59 The goal of this study was to examine the population structure of historic *P. infestans*  
60 using a large global set of outbreak samples<sup>22</sup>. The primary objectives of this research were: (1)  
61 to infer the population structure of historic *P. infestans* on six continents (2) Examine the spatial  
62 biogeography and diversity of FAM-1 and US-1 genotypes over space and time; and (3) compare  
63 the impact of host diversity on genotype diversity and (4) infer putative migration pathways of  
64 the pathogen into Africa, Asia and Australia/Oceania.

## 65 **Results**

### 66 **Population Structure**

67 A total of 137 historic samples were genotyped with microsatellites (Table 1). The FAM-  
68 1 (n=101) and US-1 (n=36) genotypes were identified in the set of historic samples. A subset of  
69 67 samples were genotyped for mtDNA haplotype and identified as the Herb-1 mitochondrial

70 haplotype, while 32 specimens, all US\_1's were the Ib mitochondrial haplotype. The FAM-1  
71 genotype was the first lineage detected in specimens from most countries sampled (Table 1).  
72 (Fig. 1)

73 The earliest FAM-1 genotype was found in France in 1845 (K 71) and the most recent  
74 FAM-1 was found in Malaysia in 1987 (K 174) (Fig 1, Table1). This indicates that the famine  
75 lineage circulated for more than 144 years. In contrast, the earliest US-1 genotype was identified  
76 later in the US in 1931 (BPI 186927) and the most recent sample was from India in 1991 (IMI  
77 344673) indicating that US-1 genotype circulated for 60 years, less than half the time of FAM-1.

78 Greater subclonal variation was found in FAM-1 than US-1 genotypes on all continents  
79 but Africa, where US-1 was more diverse (Table 1). There were 85 multilocus genotypes  
80 (MLGs) of FAM-1 and 36 MLGs of US-1 (Table 1). The greatest diversity of FAM-1 MLGs  
81 occurred in specimens from North America, Europe and Asia. FAM-1 displayed higher diversity  
82 values across all calculated indices, as well as a higher index of association (Ia) and standardized  
83 index of association ( $\bar{r}_d$ ) than US-1.

84 The majority of the herbarium samples (111) were collected from potato, while only 13  
85 were from tomato (Table 1). The remaining specimens were from petunia or wild species of  
86 *Solanum species*. There were higher numbers of MLGs from potato than tomato, and greater  
87 genetic diversity and higher indices of association/ $\bar{r}_d$  were found in specimens from potato than  
88 tomato.

89 Several SSR loci were useful for distinguishing the FAM-1 genotype from US-1.

90 Diagnostic loci were Pi70 (192/192 in FAM-1 and 189/192 in US-1), PiG11 (160/200 in FAM-1  
91 and 152/156/200 in US-1), PinfSSR2 (173/173 in FAM-1 and 173/177 in US-1), and Pi4B

92 (209/213 in FAM-1 and 213/217 in US-1). The average number of alleles was higher in FAM-1  
93 (5.33) than in US-1(4.5) (Supplementary Table 2).

94 Structure analysis was done and the optimal K value was two based on results from  
95 Structure Harvester. At K=2, the Structure analysis grouped samples into two groups based on  
96 genotype (FAM-1 or US-1). FAM-1 was found before US-1 on each continent (Fig. 2).  
97 However. At K=3, US-1 genotypes were more homogeneous, while FAM-1 genotypes displayed  
98 allelic variation between the two remaining K groups. At K=3, it was noted that FAM-1  
99 genotypes showed more allelic diversity and shifted assignment from one K group to the other  
100 over time, beginning around 1911. Both FAM-1 and US-1 occurred in many geographic  
101 locations.

102 A minimum spanning network (MSN) was made with haplotypes based on the continent  
103 where the samples were collected. Two large groups within the MSN consisting of either FAM-1  
104 or US-1 genotype were observed (Fig. 3). Within the genotype clusters there was no genetic  
105 substructuring based on continent. However, the FAM-1 had a larger number of MLGs and  
106 more branches in the MSN than the US-1 and greater subclonal variation was observed (Table  
107 1). No exclusive clusters were observed by country, host, or continent, but higher numbers of  
108 haplotypes of FAM-1 were found in North America and Asia than elsewhere. There were fewer  
109 FAM-1 MLGs from Africa and they occurred on fewer branches of the MSN than MLGs from  
110 other continents, most likely due to the more recent introductions there. In contrast, there were  
111 more MLGs of US-1 in Africa than North America or Europe, indicating diversification of the  
112 US-1 genotype in east Africa.

113 A similar structure was observed from the neighbor-joining tree, with two large clades that  
114 contained either FAM-1 or US-1 genotypes (Fig. 4). When the neighbor-joining tree was

115 expanded to include modern global samples of *P. infestans*, most of the samples identified as  
116 FAM-1 or US-1 genotypes also formed homogeneous clusters within the larger neighbor-joining  
117 tree using SSRs (Fig. S1).

## 118 **Migration**

119 Potential migration paths of *P. infestans* into Africa and Asia were tested using  
120 specimens identified as FAM-1 genotype from Europe and North America. We calculated the  
121 probabilities of scenarios that hypothesized movement of *P. infestans* based on a North  
122 American source, a European source, and either source with a constant or a varying population  
123 size, and a source based on an admixture of European and North American populations (Fig. 5).

124 The most likely scenario indicated a divergence first of the European genotypes of FAM-  
125 1 from a North American source, followed by a divergence of the African and or Asian FAM-1  
126 genotypes occurred from a European source (Scenario 1,  $P=0.3506$  and  $0.3222$  for Africa and  
127 Asia, respectively) (Supplementary Table 3). Confidence in the scenario choice was evaluated by  
128 using simulated datasets to calculate error percentages between the three scenarios with the  
129 highest probabilities. Estimation of type I error for scenarios using the Asian data revealed that  
130 53.2% of simulated datasets using this scenario resulted in the highest posterior probability for  
131 Scenario 1 when compared to the two scenarios with the next highest probabilities (Scenarios 3,  
132 2) (type I error, 0.468) (Fig. 5 and Supplementary Table 3). For scenarios using the African data,  
133 estimation of type I error indicated that 35.6% of simulated datasets resulted in the highest  
134 posterior probability for Scenario 1 when compared to the next highest probabilities (Scenarios  
135 2, 4) (type I error, 0.644).

## 136 **Discussion**

137           We examined historic outbreaks of *P. infestans* from global historic sources to better  
138 understand the history of the spread of the pathogen after the first recorded outbreaks in Europe  
139 and the US using herbarium voucher specimens collected worldwide. Our data revealed the  
140 widespread presence of the FAM-1 genotype throughout the world and its dominance until the  
141 1930s, when the US-1 lineage began to emerge globally. By the end of the 1950s, FAM-1 had  
142 almost completely disappeared from collections and was displaced by US-1 genotype, most  
143 likely through movement of potatoes with resistance breeding efforts<sup>2,10</sup>. The only post-1950s  
144 FAM-1 genotype observed was collected in a single sample from Malaysia in 1987. This unusual  
145 sample suggests that the FAM-1 genotype may have continued to persist in remote areas of the  
146 world for a longer period. The Malaysian FAM-1 genotype had variable alleles at several loci  
147 when compared to earlier FAM-1 genotypes, suggesting the accumulation of mutations over time  
148 or potential hybridization with another lineage such as US-1. It clustered closely with the US-1  
149 genotype in a neighbor-joining tree of a larger set of samples. Further work is underway to  
150 sequence the genome of this specimen to understand the variation in more detail.

151           The earliest known record of the US-1 genotype in potato is from 1931 in the US<sup>10</sup>.  
152 Based on specimens analyzed in this study, the earliest known records of US-1 in Africa are  
153 from 1953 in Cameroon and Nigeria. For Asia, the oldest US-1 sample observed in this study  
154 was from 1952 in China. In South America, the oldest US-1 lineage was from Bolivia in 1944.  
155 US-1 was not identified from the samples we examined from Australia in this study, although  
156 further work is underway in our lab to genotype more specimens from Australia.

157           There is scarce information on the history of the early emergence of US-1, but records  
158 from the literature suggest an approximate period for multiple parts of the world. In 1947, while  
159 documenting the history of late blight in Tasmania, Oldaker commented on an unusual outbreak

160 of *P. infestans* in 1938, in which disease was more sporadic than it had been in previous years,  
161 but treatment with copper formulations proved effective in controlling the pathogen<sup>18</sup>. In 1951,  
162 Nattrass wrote that potatoes bred for *P. infestans* resistance were failing with the emergence of a  
163 new biotype that appeared in Tanzania (then called Tanganyika) in 1946<sup>19</sup>. Our data suggest the  
164 new biotype observed was likely the US-1 lineage in Africa. The proximity of these outbreaks  
165 suggests that US-1 genotype was spread during potato breeding trials, facilitated by the  
166 continued movement of tubers over long distances.

167 Both the FAM-1 and US-1 genotype predominantly formed two clusters that excluded all  
168 modern lineages from Europe, North America, and South America. Our previous studies of  
169 North American populations of *P. infestans* suggested a Mexican origin for many of the recent  
170 lineages of *P. infestans* circulating in the US<sup>14</sup>. The US-1 genotype has been displaced by other  
171 lineages emerging from either Europe or Mexico with metalaxyl resistance or the ability to  
172 overcome host resistance genes being bred into potatoes and tomatoes at the time.

173 Migration analyses of FAM-1 outbreak samples was analyzed using DIYABC analysis  
174 and data suggest that both the African and Asian genotypes of FAM-1 most likely emerged from  
175 a European source. Outbreaks of the disease caused by FAM-1 genotype first occurred in North  
176 America and subsequently spread to Europe<sup>10</sup>. This coincides with historic records and our  
177 previous studies that support the migration of *P. infestans* into Europe after outbreaks occurred  
178 in North America<sup>2,10,22</sup>. The top migration scenario for emergence into Africa and Asia is from a  
179 European source. We do not attempt to identify source countries within Europe but likely  
180 sources from historical records include countries such as the UK and or the NL.

181 Our data and examination of global herbarium sources suggest that the pathogen likely  
182 moved first on potatoes and then spread later into tomato<sup>22</sup>. There was greater genetic diversity



183 among potato than tomato genotypes of FAM-1 and more MLGs among the potato genotypes.  
184 There were also more infected potato than tomato specimens in a global search of archival  
185 collections<sup>22</sup>. The FAM-1 genotype was also more genetically diverse than the US-1 genotype.

186 The findings of our study are supported by historical reports published by researchers  
187 contemporary to the time of the initial outbreaks and provide insight into potential sources<sup>4,17-  
188 19,23</sup>. Potatoes were disseminated across the world by European sailors and missionaries, with  
189 varying degrees of adoption by local populations<sup>24</sup>. As European colonists moved into new  
190 regions, potatoes moved with them. Potatoes were actively encouraged as food for native people  
191 during colonization and touted as cheap and nutritious. Potatoes were cited by European scholars  
192 to “elevate the happiness and well-being of native peoples”, and subsequently were useful for  
193 developing the labor force of the colonizing empire<sup>25</sup>. In India, this mentality resulted in the  
194 dissemination of potatoes to local villages by horticultural and agricultural societies, despite the  
195 crop having already been adopted as a cash crop to sell to British soldiers<sup>25,26</sup>.

196 Potatoes continued to move into colonial regions long after their establishment. A  
197 colonial handbook for Kenya from 1920 states that potatoes grown from locally produced seed  
198 were not as productive, and recommended regularly importing fresh seed potatoes from Europe.  
199 This would have provided an obvious avenue for the introduction of *P. infestans*<sup>27</sup>. Regular  
200 imports of potatoes were observed in other parts of the world as well. A 1904 agricultural report  
201 for the Philippines compared the quality of natively grown potatoes to imported ones found in  
202 Manila markets, suggesting a potential introduction route, mostly likely via the US<sup>28</sup>. In India,  
203 the pathogen was reported in the area circa 1870-1880 based on reports from local agri-  
204 horticultural societies. In letters it was stated that a major late blight outbreak in the Nilgiri  
205 region around 1893 was the result of the importation of potatoes from a large nursery in

206 England<sup>17</sup>. In East Africa it was believed that the first outbreak located outside of Nairobi,  
207 Kenya, was the result of an importation of Kerr's Pink potatoes for planting from the United  
208 Kingdom, bolstered by a wet and rainy season<sup>4</sup>. In West Africa, however, it was thought that *P.*  
209 *infestans* was introduced as the result of the importation of potatoes from France. While intended  
210 for use as food, potatoes were also planted, resulting in the propagation of the pathogen<sup>23</sup>.  
211 *Phytophthora infestans* followed the movements by colonists of potato, leading to its  
212 introduction from the US and Europe into the African, Asian and Australian/Oceanic continents.

213         With the extensive reach of the British Empire (Fig. 1), it is likely that many  
214 introductions of the pathogen were the result of movement of potatoes on British ships, with  
215 multiple introductions over time as new shipments of tubers were imported into colonies. We are  
216 currently doing whole genome analysis of globally sourced specimens to provide more  
217 information on the role of host diversity and host jumps in global pathogen spread. The FAM-1  
218 genotype was diploid<sup>11</sup> and asexual, was able to colonize susceptible potato on six continents and  
219 thus caused global pandemics. Our data document that the FAM-1 genotype adapted to many  
220 environments, occurred mostly on potato, and remained aggressive for over 140 years.

221

## 222 **Methods**

223         Over 1280 late blight specimens collected in the 19<sup>th</sup> and 20<sup>th</sup> century are in herbaria on six  
224 continents<sup>22</sup>. We sampled specimens from 37 countries on six continents including North  
225 America, South America, Europe, Africa, Asia and Oceania (Fig. 1) (Supplementary Table 1).  
226 *Phytophthora infestans* was sampled from herbarium specimens collected in Africa, Asia,  
227 Europe, Oceania, North America, and South America. A total of 137 samples were genotyped  
228 with microsatellites, consisting of 18 African samples (1942 – 1973), 32 Asian samples (1901 –

229 1991), 2 Oceania samples (1911 – 1917), 29 European samples (1873 – 1970), 48 North  
230 American samples (1855 – 1958), and 8 South American samples (1913 – 1967) (Supplementary  
231 Table 1).

232 We collected SSR data for an additional 194 samples was obtained from databases,  
233 published studies, and theses<sup>10,29,30</sup>. These included data from modern populations from Saville et  
234 al.<sup>10</sup> and representatives of current common European lineages from the outbreak tracking  
235 system Euroblight.org. In addition we included a subset of data from publications on current  
236 Mexican populations<sup>29,30</sup>.

### 237 **DNA Extraction, PCR, and Genotyping**

238 DNA was extracted from lesions present on each herbarium voucher using either a  
239 Qiagen DNEasy Plant Mini Kit (Qiagen, Valencia, CA) or a modified CTAB method using  
240 DNEasy Plant Mini Kit spin columns for cleaning and purifying DNA<sup>12</sup>. The presence of *P.*  
241 *infestans* DNA was checked using species specific primers<sup>31</sup>. All work with herbarium DNA was  
242 conducted in a lab in which no modern DNA of *P. infestans* is used, using separate equipment  
243 and reagents.

244 Mitochondrial haplotyping of samples was conducted using primers and PCR cycling  
245 conditions developed by Griffith and Shaw to detect the presence of the Ib haplotype<sup>11,32</sup>. For  
246 detecting the Herb-1 haplotype we utilized primers previously developed that target a single  
247 nucleotide polymorphism within the haplotype<sup>10</sup>. Amplicons were sequenced at the Genomic  
248 Sciences Laboratory at North Carolina State University.

249 Samples were genotyped using a 12-plex system of primers for the identification of *P.*  
250 *infestans* lineages using microsatellite loci<sup>33</sup>. To compensate for the low levels of DNA present  
251 in extractions, a modification of the PCR protocol was used that increased primer concentration,

252 sample size, and cycling times<sup>15</sup>. The Qiagen Type-It Microsatellite PCR kit (Qiagen  
253 Corporation, Valenica CA) was used for PCR reactions, and sample volumes were modified to  
254 run a 12.5µL reaction, consisting of 6.25µl of Type-It 2X master mix, 1.3µl of a 10X primer mix  
255 (Supplementary Table 4), 1.95µl ddH<sub>2</sub>O, and 1 – 3µl of DNA extract. Thermal cycling  
256 conditions consisted of initial denaturation at 95°C for 5 min, followed by 33 cycles of 95°C for  
257 30 seconds, 58°C for 90 seconds, and 72°C for 30 seconds, and then a final extension period for  
258 30 minutes at 60°C. Fragments were analyzed on an Applied Biosystems 3730xl DNA analyzer  
259 at the Genomic Sciences Laboratory at North Carolina State University using 1-3µl of PCR  
260 product in a 10.3µL reaction mix consisting of 10µL highly deionized formamide and 0.3µL  
261 LIZ500 size standard (Applied Biosystems, Foster City, CA).. Alleles were scored in Geneious  
262 11.1.5 (Biomatters Ltd., Auckland, NZ) using microsatellite plugin 1.4.6. Alleles were named  
263 using bin ranges from previously published work<sup>33,34</sup>.

## 264 **SSR Data Analysis**

265       Because of the age of herbarium DNA, recovery rates of microsatellite loci from *P.*  
266 *infestans* are lower than they would be for DNA extracted from modern samples, resulting in  
267 increased missing data. To reduce the amount of variability due to missing data, only samples  
268 with data from at least five SSR loci were used. Data were divided into six categories based on  
269 continent: Africa (Afr), Asia (As), Europe (EU), North America (NA), Oceania (Oc), and South  
270 America (SA). The broad structure of the populations was evaluated via model-based Bayesian  
271 clustering using the program Structure v. 2.3.3<sup>35</sup>. Before analysis by Structure, the data were  
272 clone corrected (clones were removed such that each population contains only one representative  
273 of each haplotype) using the R library poppr v. 2.8.1<sup>36</sup> and R v. 3.5.2<sup>37</sup>. Data were clone  
274 corrected using their region of collection as a population. The data were run using a 20,000

275 repeat burn-in and 1,000,000 MCMC repeats under a no admixture model, with each individual  
276 sample representing its own population. Independent runs of the model used  $K$  values from 1 to  
277 10 with 10 replicate runs at each value of  $K$ . The optimal  $K$  was estimated using the second order  
278 rate of change (the “Evanno method”) in the web tool Structure Harvester<sup>38,39</sup>. All runs for the  
279 optimal  $K$  value, as well as non-optimal  $K$  values, were averaged using CLUMPP v. 1.1.2<sup>40</sup>  
280 using the Greedy algorithm (M=2) with the pairwise matrix similarity statistic  $G'$  (S=2). The  
281 Greedy algorithm was used with 1000 repeats of randomly selected input orders. The resulting  
282 output was visualized with the program distruct v. 1.1<sup>41</sup>. Poppr was also used to infer population  
283 statistics including: the number of samples (N), the number of multilocus genotypes (MLG), the  
284 number of expected MLGs at the smallest sample size of at least 10 (eMLG)<sup>42</sup>, the Shannon-  
285 Weiner index of MLG diversity (H)<sup>43</sup>, the Stoddart and Taylor index of MLG diversity (G)<sup>44</sup>,  
286 Simpson index corrected for sample size by multiplying the index value by  $N/(N-1)$  ( $\lambda$ )<sup>45,46</sup>,  
287 evenness<sup>47-49</sup>, Nei’s unbiased gene diversity (Hexp)<sup>50</sup>, the index of association (Ia)<sup>51,52</sup>, and the  
288 standardized index of association( $\bar{r}_d$ )<sup>53</sup>.

289 Relationships between locations and haplotypes of samples were further explored using a  
290 minimum spanning network (MSN) based on Bruvo’s distance using the R library adegenet v  
291 2.1.1<sup>54</sup>. In addition, a neighbor-joining (NJ) tree based on Bruvo’s distance was constructed  
292 using the poppr R library and a combination (genome addition and genome loss) model. In order  
293 to utilize a complete dataset in the NJ tree for the purposes of bootstrapping, five loci with low  
294 recovery rates were removed for tree construction (PinfSSR8, PinfSSR4, Pi63, PinfSSR11,  
295 Pi4B). Any remaining samples still containing missing data were removed. The tree was  
296 bootstrapped using 1000 samplings.

297 An additional 7-plex neighbor joining tree was generated as above using the combined  
298 dataset from herbarium and modern samples. Due to the bootstrapping function used  
299 (bruvo.boot), no samples with missing data or null alleles could be used. Therefore, samples with  
300 putative null alleles were also removed from the dataset for the neighbor-joining tree.

## 301 **Migration of FAM-1**

302 Migration routes of the FAM-1 lineage of *P. infestans* into Africa and Asia from Europe  
303 and/or North America were examined using Approximate Bayesian Comparison (ABC), as  
304 implemented in the program DIYABC v. 2.0.4<sup>55</sup>. Tested migration scenarios for both African  
305 and Asian populations included direct divergence from Europe or North America, divergence  
306 including a change in population size, or admixture between European and North American  
307 populations. Parameter range priors were initialized with values from Saville et al.<sup>10</sup> and then  
308 iteratively modified to better fit our data (Supplementary Table 5). A total of 5 million datasets  
309 were simulated. Scenario probabilities were determined through comparison of the observed  
310 dataset to simulated datasets generated by DIYABC. A logistic regression of these differences  
311 was computed using ten proportions of the simulated dataset as the dependent variable and  
312 corresponding differences between the observed and simulated datasets as the independent  
313 variable. The value calculated using 50,000 simulated datasets was taken as the scenario's  
314 overall probability. Confidence in the highest scenario was evaluated using a type I error tests, in  
315 which the data were compared against 500 simulated data sets assuming the scenario with the  
316 highest probability is true and the number of times the scenario in question was correctly or  
317 incorrectly applied to the data was determined.

## 318 **Acknowledgments**

319 Appreciation is expressed to the following herbaria for providing herbarium material: Royal  
320 Botanic Gardens Kew Mycological Herbarium (K), the National Botanic Garden, Glasnevin,  
321 Dublin (DBN), the USDA National Fungus Collection, Beltsville, MD (BPI), the CABI  
322 Bioscience collection, Egham (IMI), the Farlow Herbarium Harvard University, Cambridge, MA  
323 (FH), the Museum of Evolutionary Biology, Uppsala University, Uppsala (UPS), the Cornell  
324 Plant Pathology Herbarium, Ithaca, NY (CUP), and the University of Florida Herbarium,  
325 Gainesville, FL (FLAS). Thanks to David Cooke, James Hutton Institute, for providing a set of  
326 European lineages from EuroBlight database shown in Supplemental Figure S1. Funding was  
327 provided by USDA AFRI Grant Number 5197-NCSU-USDA-3179 and USDA AFRI Grant  
328 2011-68004-30154 and the North Carolina Agricultural Research Service.

329

## 330 **Author Contribution**

331 Jbr collected the samples and conceived experiments. AS conducted experiments and analysed  
332 data. JBR and AS interpreted data and co-wrote the paper. JBR and AS contributed equally as  
333 coauthors of this work

## 334 **Data Availability**

335 Raw SSR data and binning rules can be found on GitHub link to be provided once paper is  
336 accepted. See the references in the [Supplementary Information](#) for data used in the analysis.

## 337 **References**

- 338 1 Anderson, P. K. *et al.* Emerging infectious diseases of plants: pathogen pollution, climate  
339 change and agrotechnology drivers. *Trends Ecol Evol* **19**, 535-544,  
340 doi:10.1016/j.tree.2004.07.021 (2004).  
341 2 Ristaino, J., Cooke, D. E., Acuña, I. & Muñoz, M. in *Emerging Plant Diseases and*  
342 *Global Food Security* (eds J. Ristaino & A. Records) 101-133 (American  
343 Phytopathological Society Press, 2020).

- 344 3 Hu, C. H. *et al.* Recent genotypes of *Phytophthora infestans* in the eastern United States  
345 reveal clonal populations and reappearance of mefenoxam sensitivity. *Plant Disease* **96**,  
346 1323-1330 (2012).
- 347 4 Cox, A. E. & Large, E. C. Potato blight epidemics throughout the world. *Agriculture*  
348 *Handbook* **174**, 1-230 (1960).
- 349 5 Bourke, P. M. A. Emergence of Potato blight, 1843-46. *Nature* **203**, 805-808(1964).
- 350 6 Martin, M. D. *et al.* Reconstructing genome evolution in historic samples of the Irish  
351 potato famine pathogen. *Nature Communications* **4**, 2172, doi:10.1038/ncomms3172;  
352 10.1038/ncomms3172 (2013).
- 353 7 Martin, M. D., Ho, S. Y. W., Wales, N., Ristaino, J. B. & Gilbert, M. T. P. Persistence of  
354 the mitochondrial lineage responsible for the Irish potato famine in extant New World  
355 *Phytophthora infestans*. *Molecular Biology and Evolution* **31**, 1414-1420,  
356 doi:10.1093/molbev/msu086 (2014).
- 357 8 Yoshida, K. *et al.* The rise and fall of the *Phytophthora infestans* lineage that triggered  
358 the Irish potato famine. *Elife* **2**, e00731, doi:10.7554/eLife.00731 (2013).
- 359 9 Yoshida, K. *et al.* Mining herbaria for plant pathogen genomes: back to the future. *PLOS*  
360 *Pathogens* **10**, e1004028, doi:10.1371/journal.ppat.1004028 (2014).
- 361 10 Saville, A. C., Martin, M. D. & Ristaino, J. B. Historic late blight outbreaks caused by a  
362 widespread dominant lineage of *Phytophthora infestans* (Mont.) de Bary. *PLOS ONE* **11**,  
363 e0168381, doi:10.1371/journal.pone.0168381 (2016).
- 364 11 Martin, M. D. *et al.* Genomic characterization of a South American *Phytophthora* hybrid  
365 mandates reassessment of the geographic origins of *Phytophthora infestans*. *Mol Biol*  
366 *Evol* **33**, 478-491, doi:10.1093/molbev/msv241 (2016).
- 367 12 May, K. J. & Ristaino, J. B. Identity of the mtDNA haplotype(s) of *Phytophthora*  
368 *infestans* in historical specimens from the Irish potato famine. *Mycological Research* **108**,  
369 471-479 (2004).
- 370 13 Ristaino, J. B., Groves, C. T. & Parra, G. R. PCR amplification of the Irish potato famine  
371 pathogen from historic specimens. *Nature* **411**, 695-697, doi:10.1038/35079606 (2001).
- 372 14 Saville, A. & Ristaino, J. B. Genetic structure and subclonal variation of extant and  
373 recent U.S. lineages of *Phytophthora infestans*. *Phytopathology* **109**, 1614-1627,  
374 doi:10.1094/phyto-09-18-0357-r (2019).
- 375 15 Cooke, D. E. L., Cano, L. M., Raffaele, S., Bain, R. A., Cooke, L. R., Etherington, G. J.,  
376 Deahl, K., Farrer, R. A., Gilroy, E. M., Goss, E. M., Grünwald, N. J., Hein, I., MacLean,  
377 D., McNicol, J. W., Randall, E., Oliva, R. F., Pel, M. A., Shaw, D. S., Squires, J. N.,  
378 Taylor, M. C. Vleeshouwers, V. G. A. A., Birch, P. R. J., Lees, A. K., and Kamoun, S.  
379 Genome analyses of an aggressive and invasive lineage of the Irish potato famine  
380 pathogen. *PLOS Pathogens* **8**, e1002940. (2012).
- 381 16 Birch, P. R. J. & Cooke, D. E. L. The early days of late blight. *eLife* **2**, e00954-e00954,  
382 doi:10.7554/eLife.00954 (2013).
- 383 17 Butler, E. J. Potato diseases of India. *The Agricultural Ledger* **10**, 87-124 (1903).
- 384 18 Oldaker, C. E. W. Blight (*Phytophthora infestans*) of potatoes in Tasmania. *Tasmanian*  
385 *Journal of Agriculture* **18**, 137-140 (1947).
- 386 19 Nattrass, R. M. & Ryan, M. New hosts of *Phytophthora infestans* in Kenya. *Nature* **168**,  
387 85-86, doi:10.1038/168085b0 (1951).



- 388 20 Vega-Sánchez, M. E. *et al.* Host adaptation to potato and tomato within the US-1 clonal  
389 lineage of *Phytophthora infestans* in Uganda and Kenya. *Plant Pathology* **49**, 531-539,  
390 doi:10.1046/j.1365-3059.2000.00487.x (2000).
- 391 21 Ochwo, M. K. N. *et al.* Genetic diversity of *Phytophthora infestans* (Mont.) de Bary in  
392 the Eastern and Western highlands of Uganda. *Journal of Phytopathology* **150**, 541-542,  
393 doi:10.1046/j.1439-0434.2002.00794.x (2002).
- 394 22 Ristaino, J. B. The importance of mycological and plant herbaria in tracking plant killers.  
395 *Frontiers in Ecology and Evolution* **7**, doi:10.3389/fevo.2019.00521 (2020).
- 396 23 Russell, T. A. Potato blight in West Africa. *Empire Journal of Experimental Agriculture*  
397 **22**, 19-22 (1954).
- 398 24 Laufer, B. & Wilbur, C. M. *The American plant migration. Part I: the potato. Part I: the*  
399 *potato.* (Field Museum of Natural History, 1938).
- 400 25 Earle, R. Food, colonialism and the quantum of happiness. *History Workshop Journal* **84**,  
401 170-193, doi:10.1093/hwj/dbx046 (2017).
- 402 26 Arnold, D. Agriculture and ‘improvement’ in early colonial India: A pre-history of  
403 development. *Journal of Agrarian Change* **5**, 505-525, doi:10.1111/j.1471-  
404 0366.2005.00110.x (2005).
- 405 27 Great Britain. *A handbook of Kenya Colony (British East Africa) and the Kenya*  
406 *Protectorate (protectorate of Zanzibar).* 413 (H.M. Stationery Off.; Printed by F. Hall at  
407 the University Press, 1920).
- 408 28 Philippines. Report of the Bureau of Agriculture for the year ended August 31, 1904.  
409 *Report of the Insular Bureau of Agriculture 1905*, v. (1902).
- 410 29 Shakya, S. K., Larsen, M. M., Cuenca-Condoy, M. M., Lozoya-Saldaña, H. & Grünwald,  
411 N. J. Variation in genetic diversity of *Phytophthora infestans* populations in Mexico from  
412 the center of origin outwards. *Plant Disease* **102**, 1534-1540, doi:10.1094/PDIS-11-17-  
413 1801-RE (2018).
- 414 30 Wang, J. *et al.* High levels of diversity and population structure in the potato late blight  
415 pathogen at the Mexico centre of origin. *Molecular Ecology* **26**, 1091-1107,  
416 doi:10.1111/mec.14000 (2017).
- 417 31 Ristaino, J. B., Hu, C. H. & Fitt, B. D. L. Evidence for presence of the founder Ia mtDNA  
418 haplotype of *Phytophthora infestans* in 19th century potato tubers from the Rothamsted  
419 archives. *Plant Pathology* **62**, 492-500, doi:doi:10.1111/j.1365-3059.2012.02680.x  
420 (2013).
- 421 32 Griffith, G. W. & Shaw, D. S. Polymorphisms in *Phytophthora infestans*: Four  
422 mitochondrial haplotypes are detected after PCR amplification of DNA from pure  
423 cultures or from host lesions. *Applied and Environmental Microbiology* **64**, 4007-4014  
424 (1998).
- 425 33 Li, Y., Cooke, D. E. L., Jacobsen, E. & van der Lee, T. Efficient multiplex simple  
426 sequence repeat genotyping of the oomycete plant pathogen *Phytophthora infestans*.  
427 *Journal of Microbiological Methods* **92**, 316-322 (2013).
- 428 34 Martin, F. N. *et al.* Insights into evolving global populations of *Phytophthora infestans*  
429 via new complementary mtDNA haplotype markers and nuclear SSRs. *PLOS ONE* **14**,  
430 e0208606, doi:10.1371/journal.pone.0208606 (2019).
- 431 35 Pritchard, J. K., Stephens, M. & Donnelly, P. Inference of population structure using  
432 multilocus genotype data. *Genetics* **155**, 945-959 (2000).

- 433 36 Kamvar, Z. N., Tabima, J. F. & Grünwald, N. J. Poppr: an R package for genetic analysis  
434 of populations with clonal, partially clonal, and/or sexual reproduction. *PeerJ* **2**, e281,  
435 doi:10.7717/peerj.281 [doi] (2014).
- 436 37 R: A language and environment for statistical computing v. 3.5.2 (R Foundation for  
437 Statistical Computing, Vienna, Austria, 2019).
- 438 38 Earl, D. A. & vonHoldt, B. M. STRUCTURE HARVESTER: a website and program for  
439 visualizing STRUCTURE output and implementing the Evanno method. *Conservation*  
440 *Genetics Resources* **4**, 359-361, doi:10.1007/s12686-011-9548-7 (2012).
- 441 39 Evanno, G., Regnaut, S. & Goudet, J. Detecting the number of clusters of individuals  
442 using the software STRUCTURE: a simulation study. *Mol Ecol* **14**, 2611-2620,  
443 doi:10.1111/j.1365-294X.2005.02553.x (2005).
- 444 40 Jakobsson, M. & Rosenberg, N. A. CLUMPP: a cluster matching and permutation  
445 program for dealing with label switching and multimodality in analysis of population  
446 structure. *Bioinformatics* **23**, 1801-1806, doi:10.1093/bioinformatics/btm233 (2007).
- 447 41 Rosenberg, N. A. DISTRUCT: a program for the graphical display of population  
448 structure. *Molecular Ecology Notes* **4**, 137-138, doi:10.1046/j.1471-8286.2003.00566.x  
449 (2004).
- 450 42 Hurlbert, S. H. The nonconcept of species diversity: A critique and alternative  
451 parameters. *Ecology* **52**, 577-586, doi:10.2307/1934145 (1971).
- 452 43 Shannon, C. E. A mathematical theory of communication. *SIGMOBILE Mob. Comput.*  
453 *Commun. Rev.* **5**, 3-55, doi:10.1145/584091.584093 (2001).
- 454 44 Stoddart, J. A. & Taylor, J. F. Genotypic diversity: estimation and prediction in samples.  
455 *Genetics* **118**, 705 (1988).
- 456 45 Simpson, E. H. Measurement of diversity. *Nature* **163**, 688, doi:10.1038/163688a0  
457 (1949).
- 458 46 Wang, J. *et al.* High levels of diversity and population structure in the potato late blight  
459 pathogen at the Mexico centre of origin. *Molecular Ecology* **26**, 1091-1107,  
460 doi:10.1111/mec.14000 (2017).
- 461 47 Pielou, E. C. *Ecological Diversity*. (New York : Wiley, 1975., 1975).
- 462 48 Ludwig, J. A. R., J.F. *Statistical ecology : a primer on methods and computing*. (New  
463 York : Wiley, c1988., 1988).
- 464 49 Grünwald, N. J., Goodwin, S. B., Milgroom, M. G. & Fry, W. E. Analysis of genotypic  
465 diversity data for populations of microorganisms. *Phytopathology* **93**, 738-746,  
466 doi:10.1094/PHYTO.2003.93.6.738 (2003).
- 467 50 Nei, M. Estimation of average heterozygosity and genetic distance from a small number  
468 of individuals. *Genetics* **89**, 583 (1978).
- 469 51 Brown, A. H. D., Feldman, M. W. & Nevo, E. Multilocus structure of natural populations  
470 of *Hordeum spontaneum*. *Genetics* **96**, 523 (1980).
- 471 52 Smith, J. M., Smith, N. H., O'Rourke, M. & Spratt, B. G. How clonal are bacteria?  
472 *Proceedings of the National Academy of Sciences of the United States of America* **90**,  
473 4384-4388 (1993).
- 474 53 Agapow, P.-M. & Burt, A. Indices of multilocus linkage disequilibrium. *Molecular*  
475 *Ecology Notes* **1**, 101-102, doi:10.1046/j.1471-8278.2000.00014.x (2001).
- 476 54 Jombart, T. adegenet: a R package for the multivariate analysis of genetic markers.  
477 *Bioinformatics* **24**, 1403-1405, doi:10.1093/bioinformatics/btn129 (2008).

478 55 Cornuet, J. M., Ravigne, V. & Estoup, A. Inference on population history and model  
479 checking using DNA sequence and microsatellite data with the software DIYABC (v1.0).  
480 *BMC Bioinformatics* **11**, 401, doi:10.1186/1471-2105-11-401 (2010).

481

**Table 1:** Population statistics of populations of *Phytophthora infestans* from historic global outbreaks sorted by genotype and by region and based on microsatellite data obtained from herbarium specimens.

| Population <sup>a</sup>                         | <i>N</i> <sup>b</sup> | MLG | eMLG(SE) <sup>d</sup> | H    | G    | $\lambda$ | Evenne<br>ss | Hexp  | Ia <sup>e</sup> | $\bar{r}_d$ |  |
|-------------------------------------------------|-----------------------|-----|-----------------------|------|------|-----------|--------------|-------|-----------------|-------------|--|
| <b>Africa</b>                                   | <i>Genotype</i>       |     |                       |      |      |           |              |       |                 |             |  |
| FAM-1                                           | 5                     | 5   | 5.00(0.00)            | 1.61 | 5.0  | 1         | 1.000        | 0.437 | 0.936           | 0.1759      |  |
| US-1                                            | 13                    | 13  | 10(7.3e-8)            | 2.56 | 13.0 | 0.9999    | 1.000        | 0.529 | 0.417           | 0.0571      |  |
|                                                 | <i>Host</i>           |     |                       |      |      |           |              |       |                 |             |  |
| <i>Solanum lycopersicum</i>                     | 3                     | 3   | 3(0e0)                | 1.10 | 3.0  | 1         | 1.000        | 0.555 | 3.38            | 0.647       |  |
| <i>S. tuberosum</i>                             | 13                    | 13  | 10(7.30e-8)           | 2.56 | 13.0 | 0.9999    | 1.000        | 0.569 | 1.51            | 0.159       |  |
| Other ( <i>Petunia</i> sp., <i>S. incanum</i> ) | 2                     | 2   | 2(0e0)                | 0.69 | 2.0  | 1         | 1.000        | 0.764 | NA              | NA          |  |
| <b>Total</b>                                    | 18                    | 18  | 10(5.43e-7)           | 2.89 | 18.0 | 0.9995    | 1.000        | 0.568 | 1.80            | 0.191       |  |
| <b>Asia</b>                                     | <i>Genotype</i>       |     |                       |      |      |           |              |       |                 |             |  |
| FAM-1                                           | 21                    | 21  | 10.00(0.00)           | 3.05 | 21.0 | 0.9996    | 1.000        | 0.404 | 0.136           | 0.0188      |  |
| US-1                                            | 11                    | 11  | 10.00(0.00)           | 2.40 | 11.0 | 0.9999    | 1.000        | 0.481 | 0.0458          | 0.00671     |  |
|                                                 | <i>Host</i>           |     |                       |      |      |           |              |       |                 |             |  |
| <i>S. lycopersicum</i>                          | 4                     | 4   | 4(0e0)                | 1.39 | 4.0  | 1         | 1.000        | 0.561 | 3.25            | 0.411       |  |

|                      |                                                                                                                          |    |    |                |      |      |        |       |       |           |           |
|----------------------|--------------------------------------------------------------------------------------------------------------------------|----|----|----------------|------|------|--------|-------|-------|-----------|-----------|
|                      | <i>S. tuberosum</i>                                                                                                      | 23 | 23 | 10(5.03e-7)    | 3.14 | 23.0 | 1.0005 | 1.000 | 0.497 | 1.08      | 0.111     |
|                      | Other ( <i>S. laciniatum</i> , <i>S. lyratum</i> , <i>S. marginatum</i> , <i>S. melongena</i> , <i>S. xanthocarpum</i> ) | 5  | 5  | 5(0e0)         | 1.61 | 5.0  | 1      | 1.000 | 0.533 | 0.15      | 0.0261    |
|                      | <b>Total</b>                                                                                                             | 32 | 32 | 10(0e0)        | 3.47 | 32.0 | 1.0002 | 1.000 | 0.544 | 1.113     | 0.1168    |
| <b>Europe</b>        | <b>Genotype</b>                                                                                                          |    |    |                |      |      |        |       |       |           |           |
|                      | FAM-1                                                                                                                    | 26 | 26 | 10.00(1.09e-6) | 3.26 | 26.0 | 1.0005 | 1.000 | 0.390 | 0.274     | 0.0315    |
|                      | US-1                                                                                                                     | 3  | 3  | 3(0e0)         | 1.10 | 3.0  | 1.0005 | 1.000 | 0.560 | -1.11e-16 | -8.33e-17 |
|                      | <b>Host</b>                                                                                                              |    |    |                |      |      |        |       |       |           |           |
|                      | <i>S. lycopersicum</i>                                                                                                   | 3  | 3  | 3(0e0)         | 1.10 | 3.0  | 1.334  | 1.000 | 0.386 | -0.50     | -0.50     |
|                      | <i>S. tuberosum</i>                                                                                                      | 24 | 24 | 10(4.38e-7)    | 3.18 | 24.0 | 0.9997 | 1.000 | 0.506 | 2.77      | 0.26      |
|                      | Other ( <i>S. dulcamara</i> , <i>S. nigrum</i> )                                                                         | 2  | 2  | 2(0e0)         | 0.69 | 2.0  | 1      | 1.000 | 0.548 | NA        | NA        |
|                      | <b>Total</b>                                                                                                             | 29 | 29 | 10(1.03e-6)    | 3.37 | 29.0 | 1.0005 | 1.000 | 0.495 | 2.53      | 0.23      |
| <b>North America</b> | <b>Genotype</b>                                                                                                          |    |    |                |      |      |        |       |       |           |           |

|                                      |                                            |    |    |               |           |      |        |       |       |        |         |
|--------------------------------------|--------------------------------------------|----|----|---------------|-----------|------|--------|-------|-------|--------|---------|
|                                      | FAM-1                                      | 42 | 31 | 8.91(9.63e-1) | 3.24      | 18.4 | 0.9691 | 0.711 | 0.337 | -0.189 | -0.0303 |
|                                      | US-1                                       | 6  | 6  | 6(0e0)        | 1.79      | 6.0  | 0.9996 | 1.000 | 0.540 | 1.120  | 0.123   |
|                                      | <b>Host</b>                                |    |    |               |           |      |        |       |       |        |         |
|                                      | <i>S. lycopersicum</i>                     | 3  | 3  | 3(0e0)        | 1.10      | 3.0  | 1.0005 | 1.000 | 0.490 | 0.333  | 0.075   |
|                                      | <i>S. tuberosum</i>                        | 43 | 43 | 10(9.46e-7e0) | 3.76      | 43.0 | 0.9998 | 1.000 | 0.457 | 3.695  | 0.354   |
|                                      | Other ( <i>S. nigrum</i> , <i>S. sp.</i> ) | 2  | 2  | 2(0e0)        | 0.69      | 2.0  | 1      | 1.000 | 0.488 | NA     | NA      |
|                                      | <b>Total</b>                               | 48 | 48 | 10(2.87e-6)   | 3.87      | 48.0 | 0.9998 | NA    | 0.453 | 3.461  | 0.336   |
| <b>Australia/Oceania<sup>c</sup></b> | <b>Total</b>                               | 2  | 2  | 2.00(0e0)     | 0.69      | 2.0  | 1      | 1.000 | 0.286 | NA     | NA      |
| <b>South America</b>                 | <b>Genotype</b>                            |    |    |               |           |      |        |       |       |        |         |
|                                      | FAM-1                                      | 5  | 5  | 5(0e0)        | 1.60<br>9 | 5.0  | 1      | 1.000 | 0.480 | 2.289  | 0.2501  |
|                                      | US-1                                       | 3  | 3  | 3(0e0)        | 1.10      | 3    | 1.0005 | 1.000 | 0.436 | -0.333 | -0.200  |
|                                      | <b>Host</b>                                |    |    |               |           |      |        |       |       |        |         |
|                                      | Other ( <i>Petunia sp.</i> )               | 1  | 1  | 1(0e0)        | 0.0       | 1.0  | NA     | NA    | 0.364 | NA     | NA      |
|                                      | <i>S. tuberosum</i>                        | 7  | 7  | 7(0e0)        | 1.95      | 7.0  | 0.9998 | 1.000 | 0.519 | 2.326  | 0.2204  |
|                                      | <b>Total</b>                               | 8  | 8  | 8(0e0)        | 2.08      | 8.0  | 0.875  | 1.000 | 0.566 | 0.982  | 0.0866  |

| <b>Totals</b> | <b>Genotype</b>        |     |     |                          |      |      |        |       |       |       |        |
|---------------|------------------------|-----|-----|--------------------------|------|------|--------|-------|-------|-------|--------|
|               | FAM-1                  | 101 | 85  | 32.7(1.57)               | 4.30 | 53.4 | 0.9908 | 0.718 | 0.381 | 0.41  | 0.0702 |
|               | US-1                   | 36  | 36  | 36(0e0)                  | 3.58 | 36   | 0.9997 | 1.000 | 0.508 | 0.232 | 0.0258 |
|               | <b>Host</b>            |     |     |                          |      |      |        |       |       |       |        |
|               | <i>S. lycopersicum</i> | 13  | 13  | 12(0e0)                  | 2.57 | 13.0 | 0.9999 | 1.000 | 0.461 | 1.45  | 0.194  |
|               | <i>S. tuberosum</i>    | 112 | 99  | 11.7(5.4e-1)             | 4.51 | 73.8 | 0.9950 | 0.813 | 0.461 | 2.12  | 0.220  |
|               | Other                  | 12  | 12  | 12(0e0)                  | 2.48 | 12.0 | 1.0003 | 1.000 | 0.561 | 1.41  | 0.135  |
|               | <b>Total</b>           | 137 | 121 | 34(1.36e-0) <sup>d</sup> | 4.69 | 82.7 | 0.9952 | 0.757 | 0.471 | 1.903 | 0.1952 |

<sup>a</sup> All isolates, including those with missing data (minimum=5) are included.

<sup>b</sup>n: number of individuals ; MLG: number of multilocus genotypes (MLG); eMLG: expected number of MLGs at smallest size of at least ten; SE: Standard error; H: Shannon-Weiner Index of MLG diversity; G: Stoddart and Taylor Index of MLG diversity;  $\lambda$ : corrected Simpson's Index; Hexp: Nei's 1978 gene diversity; Ia: Index of Association;  $\bar{r}_d$ : standardized index of association.

<sup>c</sup>Only two samples were collected from Oceania, and both were collected from potato and identified as FAM-1

<sup>d</sup>eMLG for the entire sample set was based on population counts by genotype

<sup>e</sup>Data for Ia and  $\bar{r}_d$  were clone corrected before analysis.





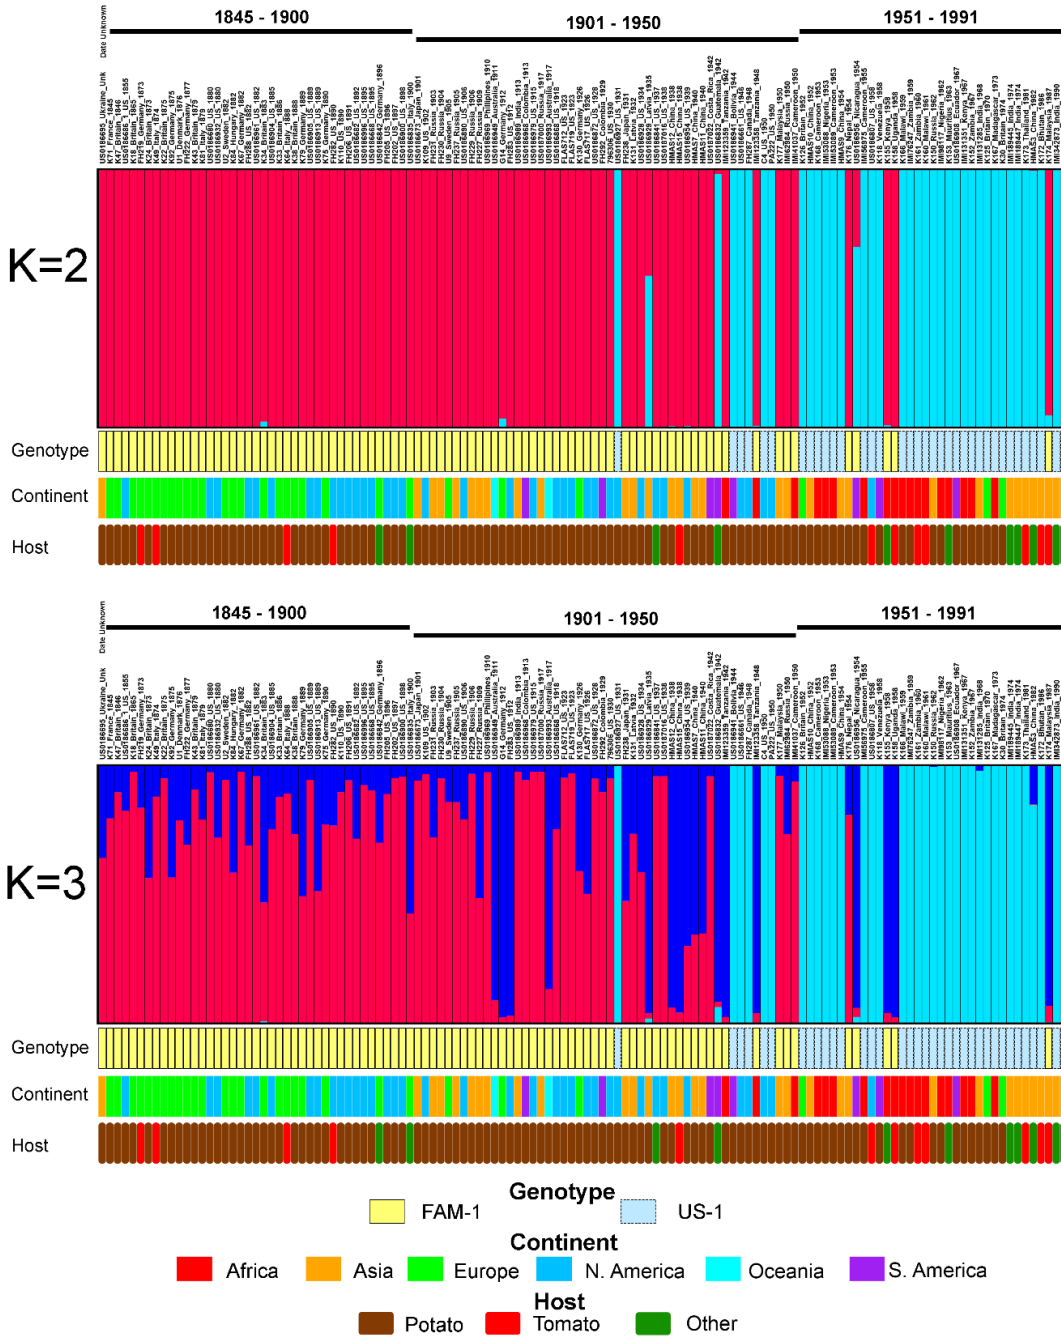

**Figure 2:** Structure analysis of SSR genotypes of *Phytophthora infestans* from herbarium specimens. Specimens are arranged in ascending chronological order. Samples were clone corrected based on region before analyzing. Results displayed are based under the assumption of two or three groups within the dataset (K=2, K=3). K=2 was calculated to be the most likely based on the second order rate of change.

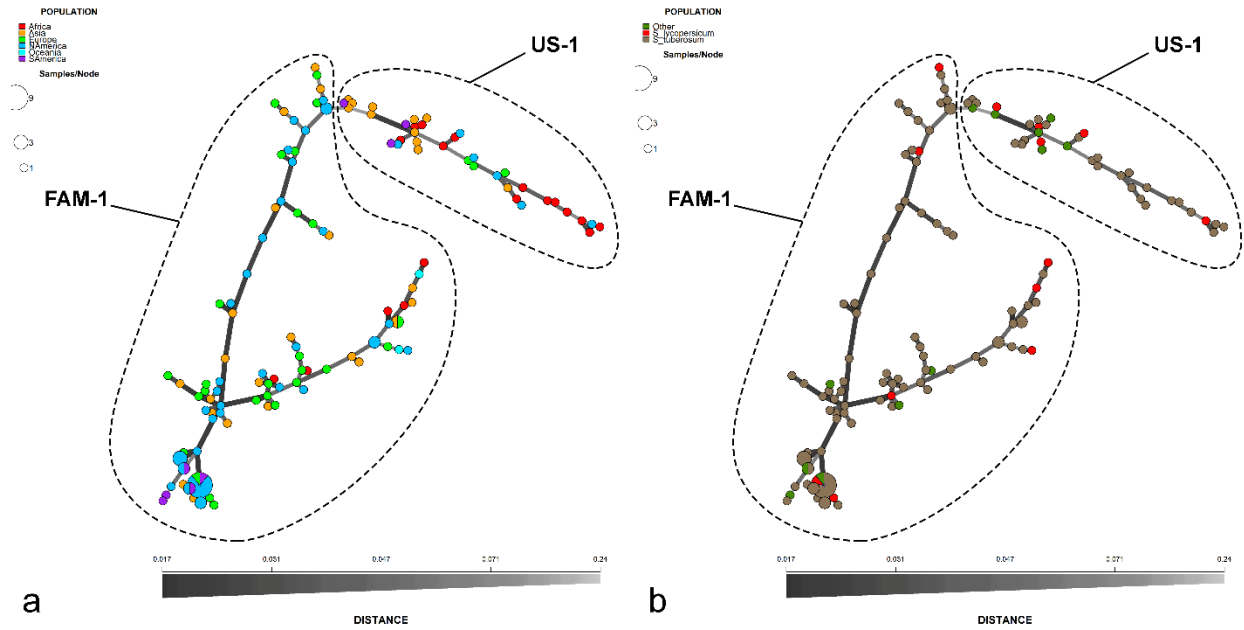

**Figure 3:** Minimum spanning network of SSR genotypes of *Phytophthora infestans* from herbarium specimens. Data are colored-coded based on (a) the continent where they were collected or (b) host. Genetic distance between haplotypes is indicated by the shade and thickness of the branches.

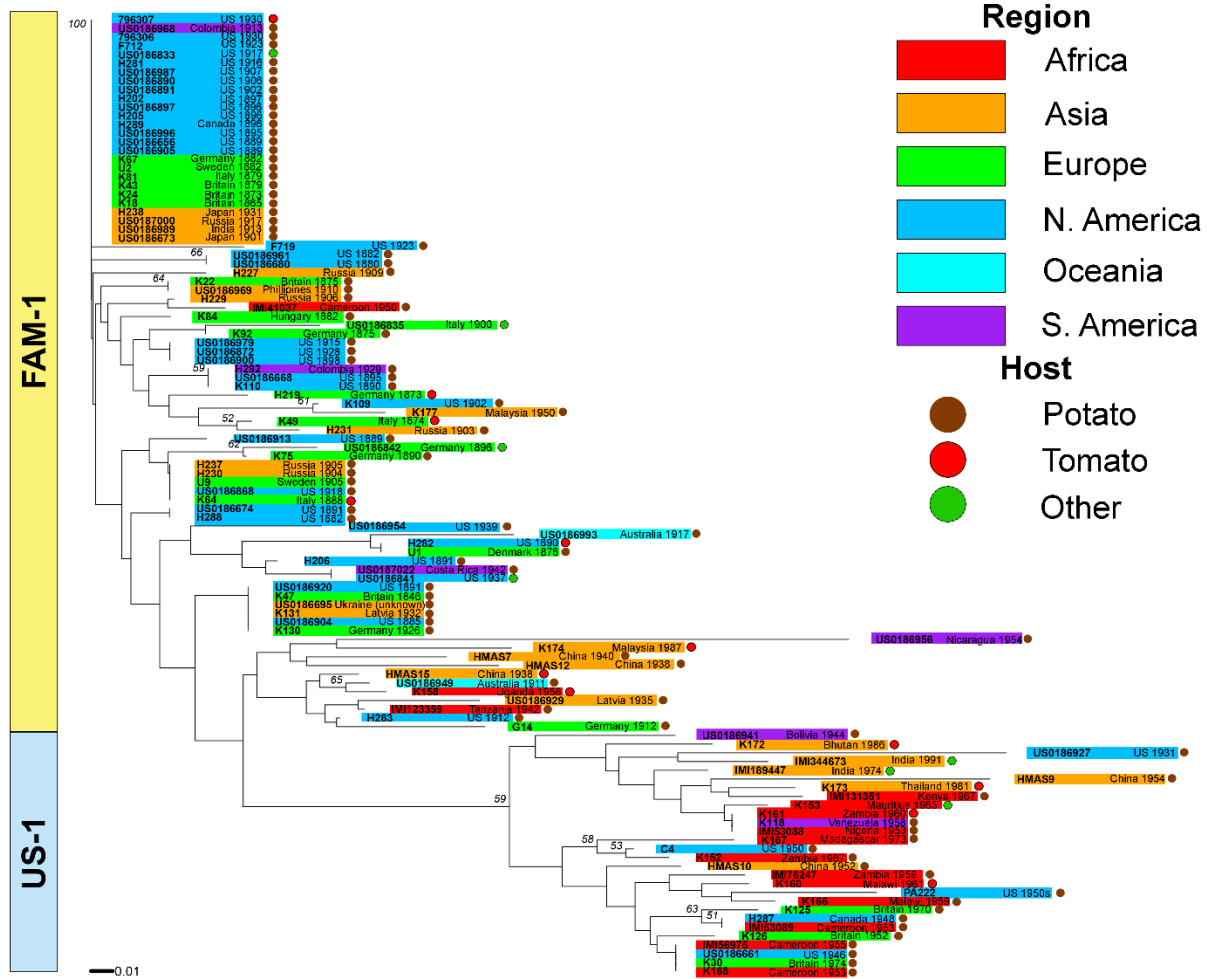

**Figure 4.** Neighbor joining tree of 7-plex SSR genotypes of *Phytophthora infestans* from herbarium specimens. Specimens are colored-coded based on the continent and host of sample. Bootstrapping was performed with 1000 replicates.

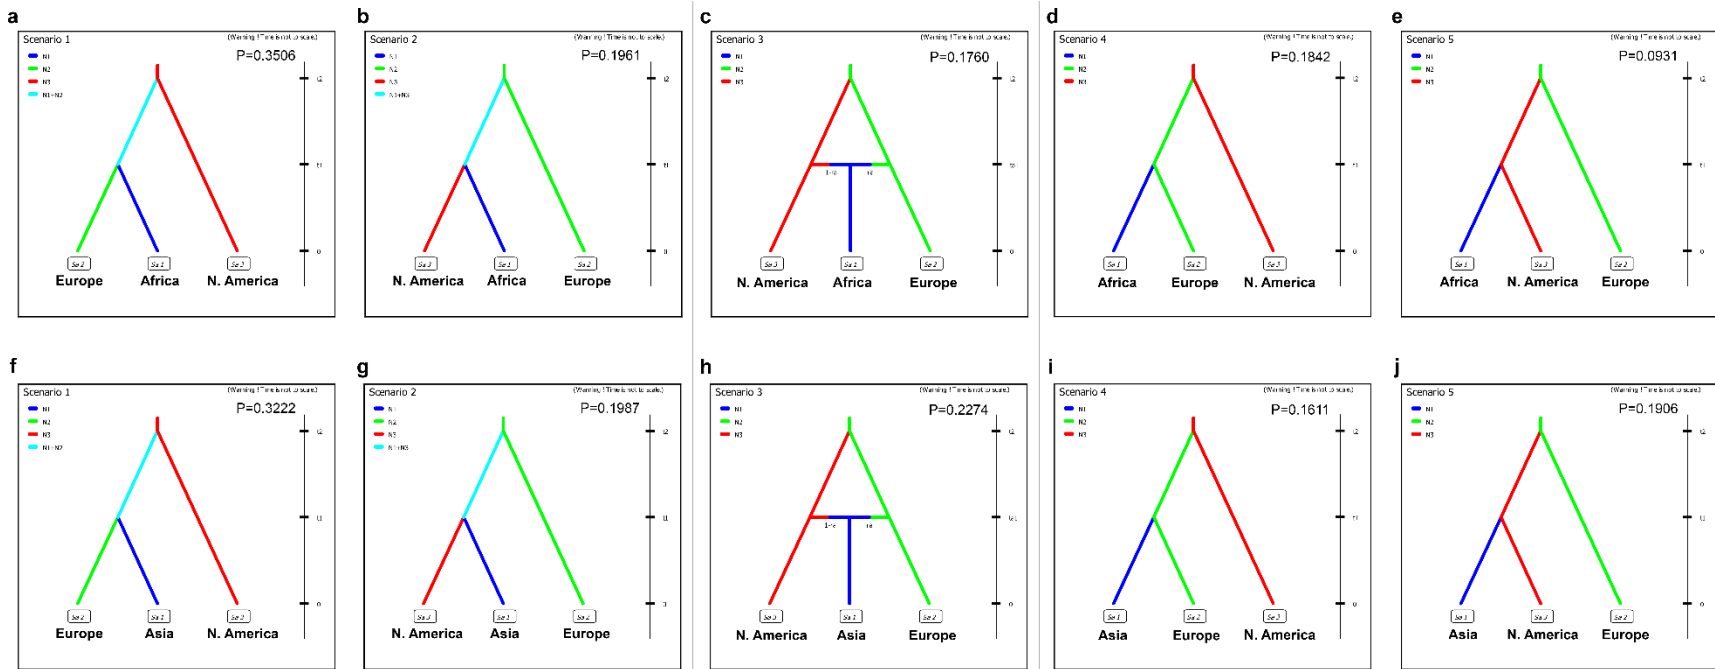

1

2

3 **Figure 5.** Posterior probabilities of migration scenarios involving populations of the FAM-1 genotype of *Phytophthora infestans* from  
 4 North America and Europe to Africa(a-e) or North America and Europe to Asia (f-j). Probabilities are based on 1% of the simulated  
 5 data.

6
